# Supplementary material for: Development of an autonomous biosampler to capture in situ aquatic microbiomes
Source: PLoS One. 2019 May 15;14(5):e0216882. doi: 10.1371/journal.pone.0216882 (PMC6519839; doi:10.1371/journal.pone.0216882)
Supplement: S4 Table — Detected in the tests performed with the Ocean Sampling Day (OSD) standard procedure and with the autonomous DNA sampler (IS-ABS) (mean ± standard deviation, n = 3). For IS-ABS two filtration pressures were selected (1 and 1.3 bar). Different superscript letters indicate significant (ANOVA, P < 0.05) differences among the three filtration procedures for each diversity index. (DOCX) [file pone.0216882.s012.docx]

**Development of an autonomous biosampler to capture *in situ* aquatic microbiomes**

**S4 Table.  Diversity indices for rare (<1%) 16S and 18S rDNA**. Detected in the tests performed with the Ocean Sampling Day (OSD) standard procedure and with the autonomous DNA sampler (IS-ABS) (mean ± standard deviation, n = 3). For IS-ABS two filtration pressures were selected (1 and 1.3 bar). Different superscript letters indicate significant (ANOVA, *P* < 0.05) differences among the three filtration procedures for each diversity index.

|  | **Diversity indices** | **OSD** | **IS-ABS** | |
| --- | --- | --- | --- | --- |
|  | **≈1bar** | **1bar** | **1.3 bar** |
| **16S rDNA** | Observed OTUs | 2531a ± 558 | 2375a ± 132 | 2680a ± 516 |
| Chao1 | 6338a ± 2789 | 5494a ± 637 | 7202a ± 3218 |
| Shannon index | 9.5a ± 0.2 | 9.3a ± 0.3 | 9.5a ± 0.3 |
| Berger Parker | 0.024a ± 0.002 | 0.03a ± 0.01 | 0.03a ± 0.01 |
| Simpson’s evenness | 0.10a ± 0.02 | 0.09a ± 0.03 | 0.09a ± 0.00 |
| Good coverage | 0.87a ± 0.05 | 0.88a ± 0.01 | 0.86a ± 0.04 |
| **18S rDNA** | Observed OTUs | 585a ± 236 | 674a ± 49 | 639a ± 106 |
| Chao1 | 828a ± 430 | 944a ± 80 | 841a ± 209 |
| Shannon index | 7.9a ± 0.5 | 8.0a ± 0.3 | 8.0a ± 0.2 |
| Berger Parker | 0.025a ± 0.005 | 0.05a ± 0.04 | 0.03a ± 0.01 |
| Simpson’s evenness | 0.26a ± 0.07 | 0.18a ± 0.06 | 0.22a ± 0.04 |
| Good coverage | 0.95a ± 0.03 | 0.94a ± 0.01 | 0.95a ± 0.02 |
